# Supplementary material for: Calorie restriction prevents age-related changes in the intestinal microbiota
Source: publisher site journal article supplement (doi:10.18632/aging.202753), 2021-03-10
Supplement: Supplementary file [file aging-v13i5-202753-supplementary-material-SD1.pdf]

SUPPLEMENTARY FIGURES

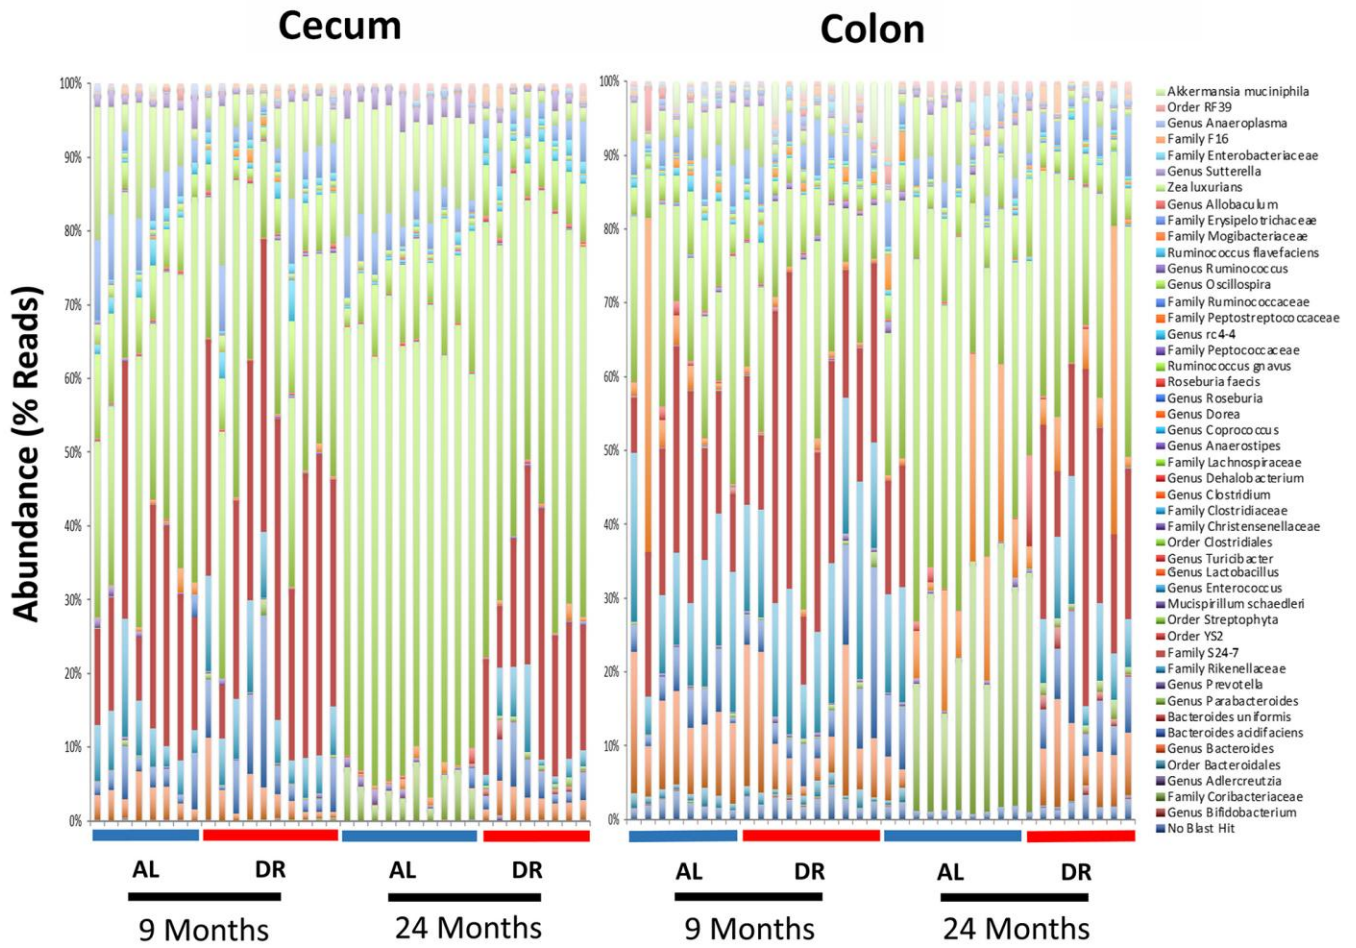

Supplementary Figure 1. Relative abundance of all the microbes in the cecum and colon of C57BL/6J mice.

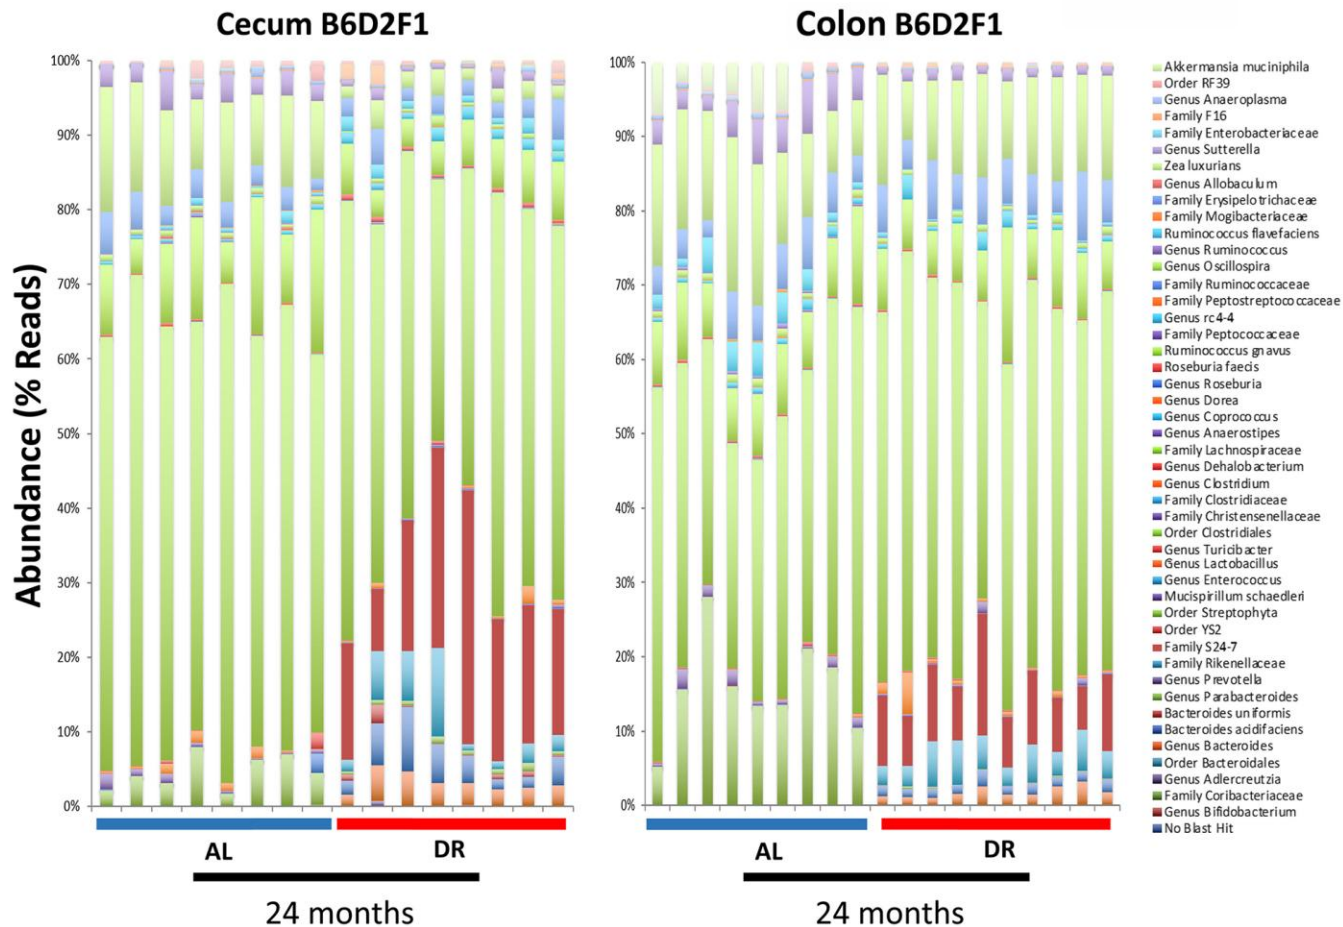

Supplementary Figure 2. Relative abundance of all the microbes in the cecum and colon of the B6D2F1 mice.

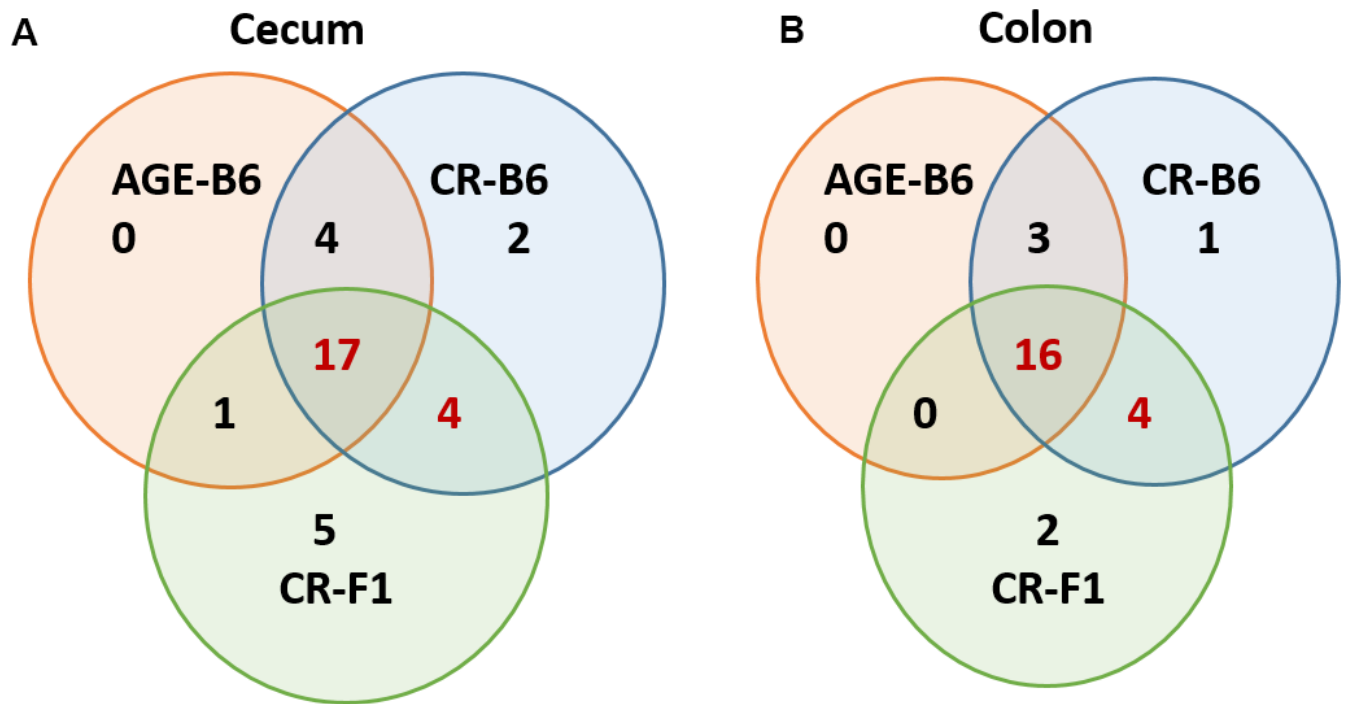

**Supplementary Figure 3.** Distribution of microbes that changed with CR in (A) Cecum and (B) Colon of both C57BL/6JN and B6D2F1 mice.
