# Supplementary material for: Calorie restriction prevents age-related changes in the intestinal microbiota
Source: publisher site journal article supplement (doi:10.18632/aging.202753), 2021-03-10
Supplement: Supplementary file [file aging-v13i5-202753-supplementary-material-SD4.pdf]

**Supplementary Table 6. List of the top 20 transcripts that show a significant [P (Corr) <= 0.05] and 2-fold change with age or CR in C57BL/6 mice.**

| Ensembl ID                                                                    | Entrez ID | Log FC   | FC (abs) | Regulation | Gene symbol          |
|-------------------------------------------------------------------------------|-----------|----------|----------|------------|----------------------|
| <b>Transcripts that change with age (Old AL vs Adult AL) in C57BL/6 mice</b>  |           |          |          |            |                      |
| ENSMUSG00000079260                                                            | 100504715 | 5.939521 | 61.37254 | up         | <i>Tmppe</i>         |
| ENSMUSG00000020826                                                            | 18126     | 5.692607 | 51.71844 | up         | <i>Nos2</i>          |
| ENSMUSG00000079494                                                            | 69049     | 4.578009 | 23.8846  | up         | <i>Nat8f5</i>        |
| ENSMUSG00000030004                                                            | 68396     | 4.480648 | 22.32593 | up         | <i>Nat8</i>          |
| ENSMUSG00000044988                                                            | 83428     | 4.337706 | 20.21992 | up         | <i>Ucn3</i>          |
| ENSMUSG00000051262                                                            | 93674     | 4.168231 | 17.97888 | up         | <i>Nat8f3</i>        |
| ENSMUSG00000035394                                                            | 74453     | 3.714172 | 13.12433 | up         | <i>Cfap53</i>        |
| ENSMUSG00000025194                                                            | 100038628 | 3.380169 | 10.41195 | up         | <i>Gm10768</i>       |
| ENSMUSG00000087361                                                            | 68400     | 3.302278 | 9.864719 | up         | <i>0610043K17Rik</i> |
| ENSMUSG00000031302                                                            | 245537    | 3.136771 | 8.795529 | up         | <i>Nlgn3</i>         |
| ENSMUSG00000002265                                                            | 18616     | -4.84128 | 28.66614 | down       | <i>Peg3</i>          |
| ENSMUSG00000054423                                                            | 27062     | -4.61523 | 24.5088  | down       | <i>Cadps</i>         |
| ENSMUSG00000055193                                                            | 317652    | -4.57431 | 23.82348 | down       | <i>Klk15</i>         |
| ENSMUSG00000025991                                                            | 227231    | -4.55286 | 23.47186 | down       | <i>Cps1</i>          |
| ENSMUSG00000031430                                                            | 78789     | -3.95537 | 15.51261 | down       | <i>Vsig1</i>         |
| ENSMUSG00000055567                                                            | 329178    | -3.80721 | 13.99862 | down       | <i>Unc80</i>         |
| ENSMUSG00000027674                                                            | 58869     | -3.75772 | 13.52654 | down       | <i>Pex5l</i>         |
| ENSMUSG00000031292                                                            | 382253    | -3.7395  | 13.35675 | down       | <i>Cdkl5</i>         |
| ENSMUSG00000074796                                                            | 269356    | -3.70428 | 13.03465 | down       | <i>Slc4a11</i>       |
| ENSMUSG00000009378                                                            | 240638    | -3.61335 | 12.23844 | down       | <i>Slc16a12</i>      |
| <b>Transcripts that change with CR (Adult CR vs Adult AL) in C57BL/6 mice</b> |           |          |          |            |                      |
| ENSMUSG00000020826                                                            | 18126     | 2.707298 | 6.530971 | up         | <i>Nos2</i>          |
| ENSMUSG00000013611                                                            | 66696     | 2.399487 | 5.276156 | up         | <i>Snx31</i>         |
| ENSMUSG00000031538                                                            | 18791     | 2.322075 | 5.00051  | up         | <i>Plat</i>          |
| ENSMUSG00000061615                                                            | 319172    | 2.292758 | 4.899918 | up         | <i>Hist1h2ab</i>     |
| ENSMUSG00000033676                                                            | 14402     | 2.282655 | 4.865725 | up         | <i>Gabrb3</i>        |
| ENSMUSG00000044988                                                            | 83428     | 2.013193 | 4.036746 | up         | <i>Ucn3</i>          |
| ENSMUSG00000108218                                                            | 257871    | 1.958138 | 3.8856   | up         | <i>Olfr1372-ps1</i>  |
| ENSMUSG00000015702                                                            | 71790     | 1.919249 | 3.782262 | up         | <i>Anxa9</i>         |
| ENSMUSG00000114442                                                            | 100038627 | 1.817609 | 3.524965 | up         | <i>F630042J09Rik</i> |
| ENSMUSG00000051262                                                            | 93674     | 1.812597 | 3.512741 | up         | <i>Nat8f3</i>        |
| ENSMUSG00000074796                                                            | 269356    | -3.10644 | 8.612539 | down       | <i>Slc4a11</i>       |
| ENSMUSG00000055193                                                            | 317652    | -2.47794 | 5.571014 | down       | <i>Klk15</i>         |
| ENSMUSG00000043165                                                            | 16939     | -2.25796 | 4.783151 | down       | <i>Lor</i>           |
| ENSMUSG00000030205                                                            | 93746     | -2.1144  | 4.330094 | down       | <i>Gprc5d</i>        |
| ENSMUSG00000031430                                                            | 78789     | -1.92479 | 3.796819 | down       | <i>Vsig1</i>         |
| ENSMUSG00000099003                                                            | 102465626 | -1.90968 | 3.757266 | down       | <i>Mir7035</i>       |
| ENSMUSG00000022225                                                            | 17228     | -1.87459 | 3.666969 | down       | <i>Cma1</i>          |
| ENSMUSG00000044083                                                            | 100504221 | -1.84962 | 3.604044 | down       | <i>Efcab8</i>        |
| ENSMUSG00000064925                                                            | 104433    | -1.81453 | 3.517459 | down       | <i>Snora62</i>       |
|                                                                               | 99169     | -1.7873  | 3.451673 | down       | <i>AU015228</i>      |
| <b>Transcripts that change with CR (Old CR vs Old AL) in old C57BL/6 mice</b> |           |          |          |            |                      |
| ENSMUSG00000027068                                                            | 241452    | 3.636485 | 12.43629 | up         | <i>Dhrs9</i>         |
| ENSMUSG00000007682                                                            | 13371     | 3.547132 | 11.68942 | up         | <i>Dio2</i>          |

|                    |           |          |          |      |                |
|--------------------|-----------|----------|----------|------|----------------|
| ENSMUSG00000030963 | 22242     | 3.267541 | 9.630031 | up   | <i>Umod</i>    |
| ENSMUSG00000030954 | 67133     | 3.209645 | 9.251227 | up   | <i>Gp2</i>     |
| ENSMUSG00000078302 | 15229     | 3.118569 | 8.685258 | up   | <i>Foxd1</i>   |
| ENSMUSG00000074796 | 269356    | 3.05619  | 8.317731 | up   | <i>Slc4a11</i> |
| ENSMUSG00000025991 | 227231    | 2.695655 | 6.478479 | up   | <i>Cps1</i>    |
| ENSMUSG00000030205 | 93746     | 2.538617 | 5.810316 | up   | <i>Gprc5d</i>  |
| ENSMUSG00000024912 | 14283     | 2.5329   | 5.78734  | up   | <i>Fosl1</i>   |
| ENSMUSG00000056716 | 432436    | 2.498507 | 5.651002 | up   | <i>Gm5420</i>  |
| ENSMUSG00000079260 | 100504715 | -4.44553 | 21.789   | down | <i>Tmppe</i>   |
| ENSMUSG00000020826 | 18126     | -4.24985 | 19.02536 | down | <i>Nos2</i>    |
| ENSMUSG00000030483 | 13088     | -3.38368 | 10.43735 | down | <i>Cyp2b10</i> |
| ENSMUSG00000039787 | 99151     | -3.02324 | 8.129922 | down | <i>Cercam</i>  |
| ENSMUSG00000027209 | 75823     | -2.65985 | 6.319671 | down | <i>Fam227b</i> |
| ENSMUSG00000038550 | 229599    | -2.57473 | 5.957578 | down | <i>Ciart</i>   |
| ENSMUSG00000000489 | 18591     | -2.528   | 5.767729 | down | <i>Pdgfb</i>   |
| ENSMUSG00000044988 | 83428     | -2.51122 | 5.701023 | down | <i>Ucn3</i>    |
| ENSMUSG00000062017 | 67928     | -2.49858 | 5.651283 | down | <i>Abca14</i>  |
| ENSMUSG00000063171 | 66184     | -2.45845 | 5.496249 | down | <i>Rps4l</i>   |

The top 20 transcripts that show a significant fold change (FC) with either age or CR in adult and old C57BL/6 mice. Log Fold Change (Log FC) between two conditions is the difference between their respective average normalized signal values. Absolute FC (FC (abs)) is computed as (sign of Log FC)  $\times 2$  |log FC|.
